# Supplementary material for: The cytolinker plectin regulates nuclear mechanotransduction in keratinocytes
Source: Oxford University Press journal article supplement (doi:10.1242/jcs.173435), 2015-11-03
Supplement: jcs173435supp.pdf [file jcs173435supp.pdf]

## Supplementary Figures

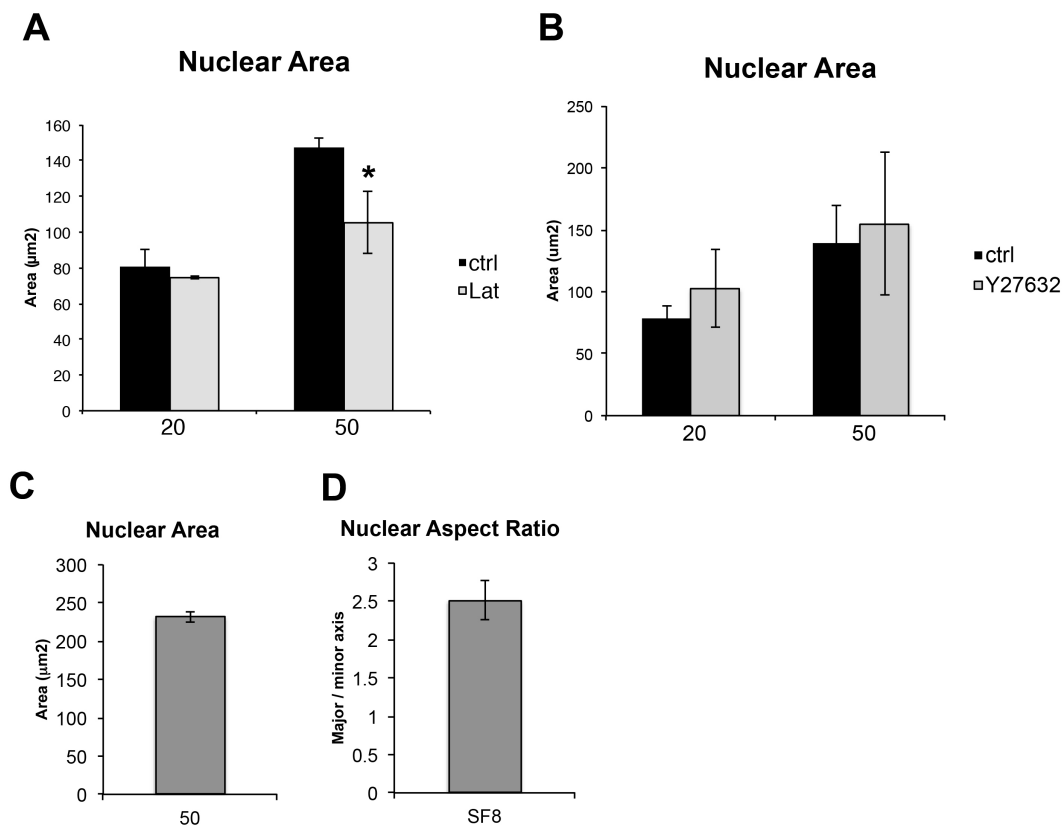

**Figure S1: Quantification of nuclear morphology of human keratinocytes and HeLa cells on micro-patterned substrates.** (A) Quantification of nuclear area of primary human keratinocytes on 20 μm and 50 μm islands following treatment with 1 μM Latrunculin A or (B) 10 μM Y27632. Data represent mean ± SEM (N=3 experiments). \*P<0.05 compared to carrier control (0.1% DMSO). (C) Quantification of nuclear cross-sectional area of HeLa cells on 50 μm islands and (D) aspect ration on SF8 islands. Data represent mean ± SEM (N=3 experiments).

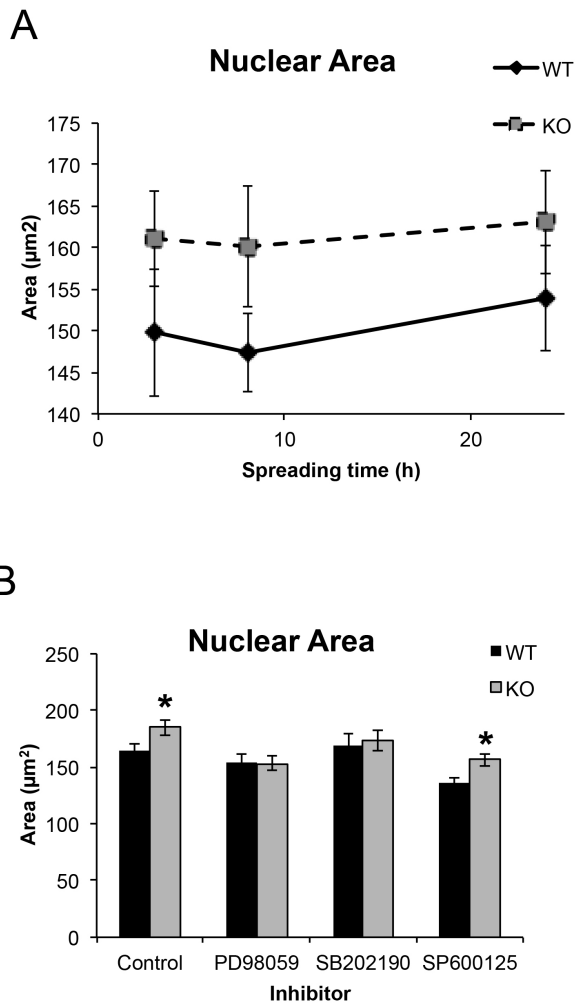

**Figure S2: Stability and MAPK dependence of Plec-induced nuclear deformation:** (A) WT and Plec KO keratinocytes were seeded on 50 µm substrates, and nuclear morphology was analysed at 4, 8, and 24 hours after seeding. Quantification of nuclear cross-sectional area in DAPI stained cells was performed using ImageJ. Data represent mean ± SEM (n=30 cells). (B) Nuclear cross-sectional area was quantified in WT and KO cells culture on 50 µm islands for 4 hours in the absence (0.1% DMSO) or presence of MAPK inhibitors, 10 µM PD98059 (Erk1/2), 2 µM SB202190 (p38), and 10 µM SP600125 (Jnk). \*P<0.05 compared to WT. Data represent mean ± SEM (n=30 cells).

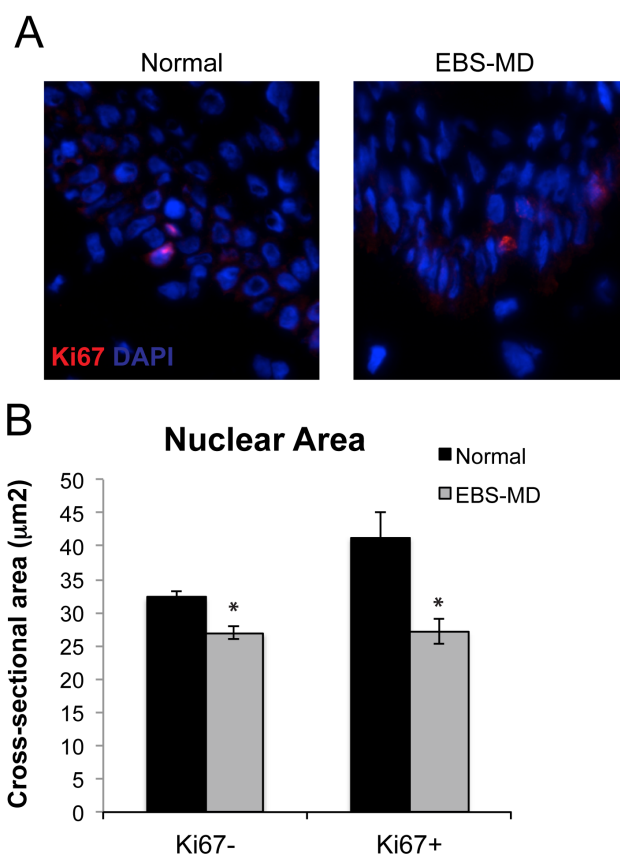

**Figure S3: Nuclear morphology in proliferative and non-proliferative cells.** (A) Representative immunofluorescence images of normal and plectin deficient, EBS-MD, skin stained for Ki67. (B) Quantification of nuclear cross-sectional area for Ki67 positive and negative cells in normal and EBS-MD skin. Data represent mean  $\pm$  SEM (n=30 cells). \*P < 0.05 compared to Normal.

**Table S1: Details of gender, age, and anatomical location of human skin samples**

| <b>Sample ID</b> | <b>Gender/Age</b> | <b>Location</b> |
|------------------|-------------------|-----------------|
| EB1              | M/neonate         | Arm             |
| EB2              | M/neonate         | Thigh           |
| EB3              | M/16 years        | Arm             |
| EB4              | F/7 months        | Thigh           |
| Normal 1         | M/neonate         | Foreskin        |
| Normal 2         | M/neonate         | Foreskin        |
| Normal 3         | F/36              | Abdomen         |
| Normal 4         | F/47              | Abdomen         |
